# Supplementary material
Source: publisher figshare collection journal article supplement (https://aacr.figshare.com/articles/dataset/_/22553478)
Supplement: Supplementary file 1 [file 40020894]

**A**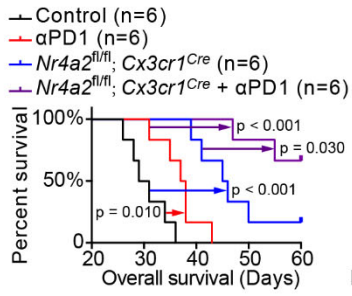**B**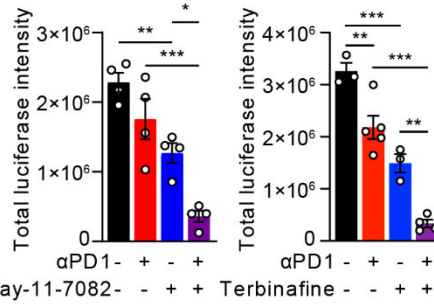**C**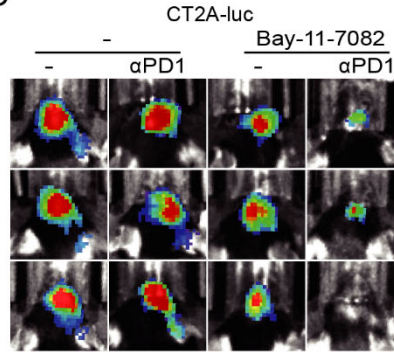**D**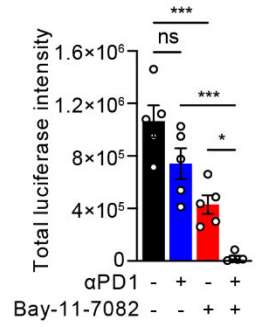**E**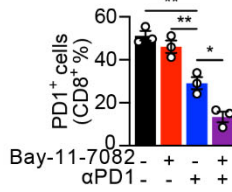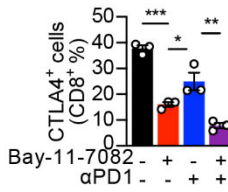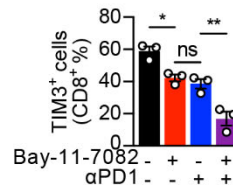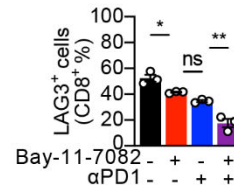**F**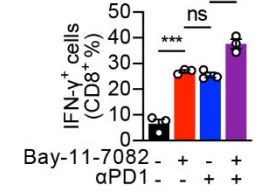**G**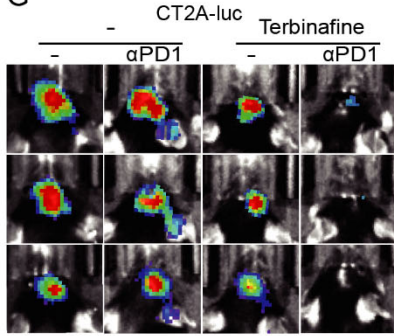**H**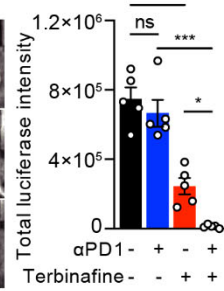**I**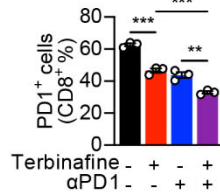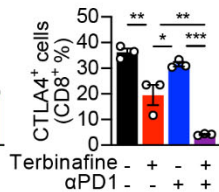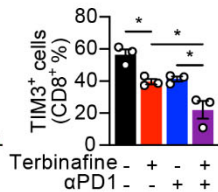**J**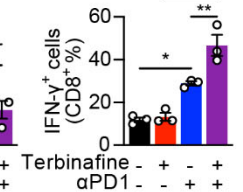

**Supplementary Figure S6. Inhibition of NR4A2 or SQLE improves the therapeutic efficacy of immune checkpoint blockade, related to Figure 7**

(A) Survival curves of *Nr4a2<sup>fl/fl</sup>* and *Nr4a2<sup>fl/fl</sup>Cx3cr1<sup>cre</sup>* glioma-bearing mice ( $2 \times 10^4$  cells) in the absence or presence of  $\alpha$ PD1 treatment.  $\alpha$ PD1 was given intraperitoneally at a dose of 500  $\mu$ g per mouse every 2 days on day 3 after tumor cell implantation (n=6 per group).

(B) Quantification of tumor volume based on bioluminescence in each treatment group.

(C, D) Representative *in vivo* bioluminescence-based images of CT2A-luc-bearing C57BL/6J mice ( $2 \times 10^4$  cells) with  $\alpha$ PD1 in the absence or presence of Bay-11-7082. Bay-11-7082 was given intraperitoneally at a dose of 25 mg/kg per mouse every 2 days on day 3 after tumor inoculation.  $\alpha$ PD1 was given intraperitoneally at a dose of 500  $\mu$ g per mouse every 2 days on day 3 after tumor cell implantation (C). Quantification of tumor volume based on bioluminescence(D) (n=4 to 6 per group).

(E, F) Flow cytometry analysis to examine immune checkpoint molecule expressions (E) and cytotoxic functions (F) of CD8<sup>+</sup> T cells in CT2A-luc-bearing C57BL/6J mice with combination treatment of Bay-11-7082 and  $\alpha$ PD1.

(G, H) Representative *in vivo* bioluminescence-based images of CT2A-luc-bearing C57BL/6J mice ( $2 \times 10^4$  cells) with  $\alpha$ PD1 in the absence or presence of terbinafine. Terbinafine was given by oral gavage at a dose of 560 mg/kg per mouse every 2 days on day 3 after tumor inoculation.  $\alpha$ PD1 was given intraperitoneally at a dose of 500  $\mu$ g per mouse every 2 days on day 3 after tumor cell implantation (G). Quantification of tumor volume based on bioluminescence(H). (n=4 to 6 per group).

(I, J) Flow cytometry analysis to examine immune checkpoint molecule expressions (I) and cytotoxic functions (J) of CD8<sup>+</sup> T cells in CT2A-luc-bearing C57BL/6J mice with combination treatment of terbinafine and  $\alpha$ PD1.

Data are shown as mean  $\pm$  SEM. In (B), (D), (E), (F), (H), (I) and (J), P value was calculated using one-way ANOVA analysis. In (A), survival difference was calculated by log-rank test. \*p < 0.05, \*\*p < 0.01, \*\*\*p < 0.001.
